# Supplementary material
Source: Springer Nature journal article supplement (https://www.springermedizin.de/resource/supplementary/13075_2009_2751_MOESM9_ESM.pdf/9692804)

A

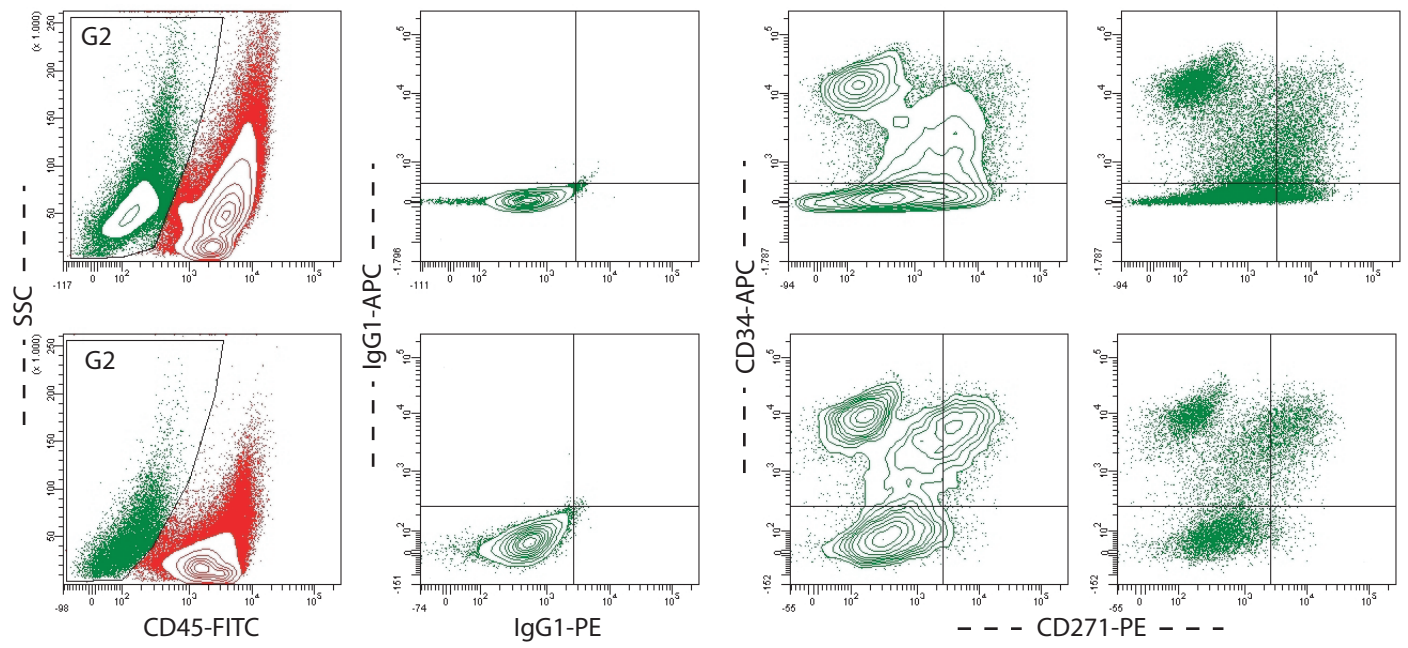

B

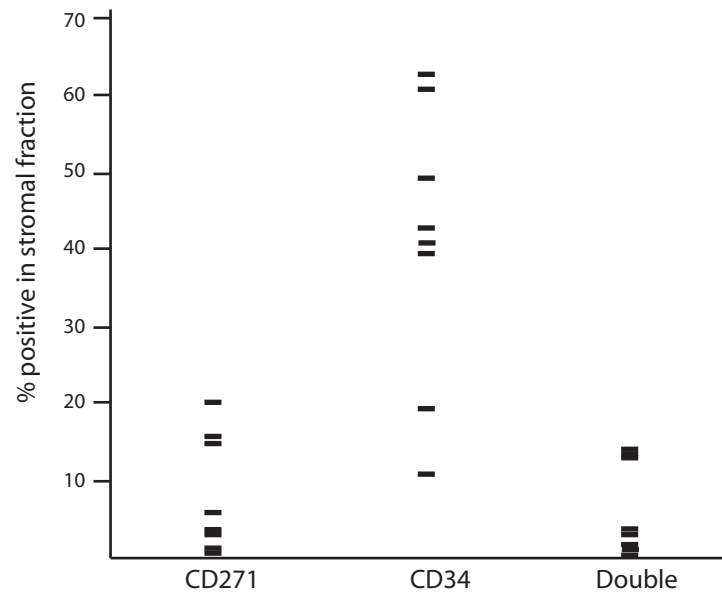

C

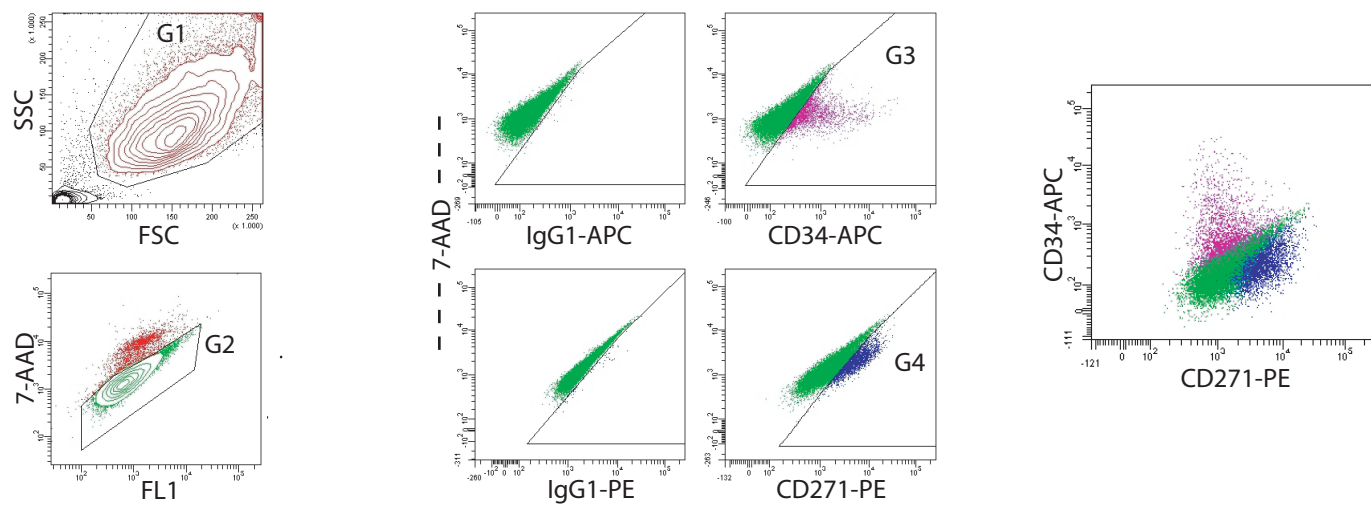

Supplement: MOESM9 [file 9692804]
